# Supplementary material for: Investigation of the benefits of the oxazolidinium cation for plastic crystal and ionic liquid electrolytes
Source: Frontiers journal article supplement (doi:10.3389/fbael.2024.1330604), 2024-02-20
Supplement: Data_Sheet_1.docx [file Data_Sheet_1.docx]

Supplementary Material

Investigation of the benefits of the oxazolidinium cation for plastic crystal and ionic liquid electrolytes

Azra Sourjah 1, Colin S.M. Kang 1, Federico M. Ferrero Vallana 1, Oliver E. Hutt 3, Luke A. O’Dell 2, and Jennifer M. Pringle *1

*** Correspondence:** Jennifer M. Pringle: [jenny.pringle@deakin.edu.au](mailto:jenny.pringle@deakin.edu.au)

**

**

**Supplementary Figure 1.** DSC 2nd heating and cooling traces of [C2moxa]+ OIPCs.





**Supplementary Figure 2.** DSC trace of [C2moxa][TFSI] salt at 2 ° C min-1 scan rate.

**Supplementary Table 1.** Ionic conductivity values for neat OIPCs/IL temperature ranging from 30- 100 °C.

| Conductivity (S cm-1) | | | |
| --- | --- | --- | --- |
| T (°C) | [C2moxa][BF4] | [C2moxa][PF6] | [C2moxa][TFSI] | [C2moxa][FTFSI] |
| 30 | 8 x 10-6 | 6 x 10-6 | 2 x 10-7 | 5 x 10-3 |
| 40 | 1 x 10-5 | 9 x 10-6 | 1 x 10-6 | 7 x 10-3 |
| 50 | 2 x 10-5 | 1 x 10-5 | 4 x 10-5 | 9 x 10-3 |
| 60 | 3 x 10-5 | 1 x 10-5 | 7 x 10-3 | 1 x 10-2 |
| 70 | 5 x 10-5 | 2 x 10-5 | 9 x 10-3 | 1 x 10-2 |
| 80 | 8 x 10-5 | 2 x 10-5 | 1 x 10-2 | 2 x 10-2 |
| 90 | 1 x 10-4 | 3 x 10-5 | 1 x 10-2 | 2 x 10-2 |
| 100 | 2 x 10-4 | 3 x 10-5 |  |  |

| Conductivity (S cm-1) | | | | | | | |
| --- | --- | --- | --- | --- | --- | --- | --- |
| T (°C) | Neat  [C2moxa][BF4] | 10 mol% LiBF4  +  [C2moxa][BF4] | 20 mol% LiBF4  +  [C2moxa][BF4] | 50 mol% LiBF4  +  [C2moxa][BF4] | Neat  [C2moxa][FSI] | 10 mol% LiFSI  + [C2moxa][FSI] | 20 mol% LiFSI  + [C2moxa][FSI] | 50 mol% LiFSI  + [C2moxa][FSI] |
| 30 | 8 x 10-6 | 2 x 10-4 | 4 x 10-4 | 3 x 10-5 | 4 x 10-6 | 8 x 10-4 | 2 x 10-3 | 8 x 10-4 |
| 40 | 1 x 10-5 | 3 x 10-4 | 6 x 10-4 | 4 x 10-5 | 5 x 10-6 | 2 x 10-3 | 4 x 10-3 | 1 x 10-3 |
| 50 | 2 x 10-5 | 5 x 10-4 | 9 x 10-4 | 7 x 10-5 | 7 x 10-6 | 3 x 10-3 | 5 x 10-3 | 2 x 10-3 |
| 60 | 3 x 10-5 | 9 x 10-4 | 1 x 10-3 | 1 x 10-4 | 1 x 10-5 | 5 x 10-3 | 6 x 10-3 | 3 x 10-3 |
| 70 | 5 x 10-5 | 1 x 10-3 | 2 x 10-3 | 2 x 10-4 | 2 x 10-5 | 8 x 10-3 | 8 x 10-3 | 4 x 10-3 |
| 80 | 8 x 10-5 | 2 x 10-3 | 3 x 10-3 | 6 x 10-4 | 2 x 10-5 | 1 x 10-2 | 1 x 10-2 | 5 x 10-3 |
| 90 | 1 x 10-4 | 3 x 10-3 | 3 x 10-3 | 2 x 10-3 | 4 x 10-5 | 1 x 10-2 | 1 x 10-2 | 6 x 10-3 |
| 100 | 2 x 10-4 | 4 x 10-3 | 4 x 10-3 | 2 x 10-3 | 6 x 10-5 | 2 x 10-2 | 1 x 10-2 | 8 x 10-3 |

**Supplementary Table 2.** Ionic conductivity values of the studied electrolyte systems, temperature ranging from 30- 100 °C.

|  | 25 °C | 30 °C | 40 °C | 50 °C | 60 °C | 70 °C |
| --- | --- | --- | --- | --- | --- | --- |
| **10 mol% LiFSI in [C2moxa][FSI]** | | | | | |  |
| DH+ (m2s-1) | 1.14 × 10-11 | 1.45 × 10-11 | 2.21 × 10-11 | 3.23 × 10-11 | 4.62 × 10-11 | 6.23 × 10-11 |
| DF- (m2s-1) | 1.38 × 10-11 | 1.73 × 10-11 | 2.62 × 10-11 | 3.84 × 10-11 | 5.35 × 10-11 | 7.17 × 10-11 |
| DLi+ (m2s-1) | 1.40 × 10-11 | 1.70 × 10-11 | 2.38 × 10-11 | 3.45 × 10-11 | 4.75 × 10-11 | 6.32 × 10-11 |
| **20 mol% LiFSI in [C2moxa][FSI]** | | | | | |  |
| DH+ (m2s-1) | 9.65 × 10-12 | 1.26 × 10-11 | 1.84 × 10-11 | 2.69 × 10-11 | 3.75 × 10-11 | 5.04 × 10-11 |
| DF- (m2s-1) | 1.15 × 10-11 | 1.45 × 10-11 | 2.19 × 10-11 | 3.16 × 10-11 | 4.32 × 10-11 | 5.75 × 10-11 |
| DLi+ (m2s-1) | 1.05 × 10-11 | 1.36 × 10-11 | 1.97 × 10-11 | 2.81 × 10-11 | 3.93 × 10-11 | 5.08 × 10-11 |
| **10 mol% LiBF4 in [C2moxa][BF4]** | | | | | |  |
| DH+ (m2s-1) | 1.53 × 10-12 | 2.09 × 10-12 | 3.72 × 10-12 | 6.39 × 10-12 | 1.04 × 10-11 | 1.63 × 10-11 |
| DF- (m2s-1) | 1.96 × 10-12 | 2.53 × 10-12 | 4.51 × 10-12 | 7.66 × 10-12 | 1.27 × 10-11 | 2.00 × 10-11 |
| DLi+ (m2s-1) | 8.02 × 10-13 | 1.12 × 10-12 | 1.98 × 10-12 | 3.52 × 10-12 | 5.89 × 10-12 | 9.15 × 10-12 |
| **20 mol% LiBF4 in [C2moxa][BF4]** | | | | | |  |
| DH+ (m2s-1) | 1.03 × 10-12 | 1.41 × 10-12 | 2.57 × 10-12 | 4.43 × 10-12 | 7.25 × 10-12 | 1.11 × 10-11 |
| DF- (m2s-1) | 1.11 × 10-12 | 1.52 × 10-12 | 2.71 × 10-12 | 4.62 × 10-12 | 7.40 × 10-12 | 1.16 × 10-11 |
| DLi+ (m2s-1) | 6.04 × 10-13 | 8.39 × 10-13 | 1.44 × 10-12 | 2.45 × 10-12 | 4.02 × 10-12 | 6.24 × 10-12 |

**Supplementary Table 3.** Self-diffusion coefficients of the electrolyte systems, from 25- 70 °C.

**Supplementary Table 4.** Diffusivity ratio of Li+ with respect to all the ions in the electrolytes at 30 °C.

| Electrolyte |  |  | Diffusivity ratio |
| --- | --- | --- | --- |
| 10 mol% LiFSI in [C2moxa][FSI] | DLi+/ DLi++ DFSI- + Dcation+ | 1.70/(1.70+1.73+1.45) | 0.35 ± 0.05 |
| 20 mol% LiFSI in [C2moxa][FSI] | DLi+/ DLi++ DFSI- + Dcation+ | 1.36/(1.36+1.45+1.26) | 0.33 ± 0.05 |
| 10 mol% LiBF4 in [C2moxa][BF4] | DLi+/ DLi++ DBF4- + Dcation+ | 1.12/(1.12+2.53+2.09) | 0.20 ± 0.05 |
| 20 mol% LiBF4 in [C2moxa][BF4] | DLi+/ DLi++ DBF4- + Dcation+ | 0.84/(0.84+1.52+1.41) | 0.22 ± 0.05 |

**Supplementary Table 5.** Estimated coulombic efficiencies of [C2moxa][LiFSI]/20 mol% LiFSI system (at RT), derived from the area of the respective cathodic and anodic peaks.

| Cycle number | Area of the stripping peak -cathodic (mA/cm2.s) | Area of the plating peak-anodic  (mA/cm2.s) | Estimated coulombic efficiency % |
| --- | --- | --- | --- |
| 1st | 195 | 103 | 53 |
| 2nd | 183 | 73 | 40 |
| 3rd | 157 | 67 | 43 |
| 4th | 143 | 60 | 42 |
| 5th | 130 | 54 | 42 |
| 6th | 121 | 51 | 42 |
| 7th | 111 | 50 | 45 |
| 8th | 103 | 46 | 45 |
| 9th | 94 | 45 | 48 |
| 10th | 87 | 42 | 47 |

**Supplementary Table 6.** Estimated coulombic efficiencies of [C2moxa][FSI]/50 mol% LiFSI system (at RT),derived from the area of the respective cathodic and anodic peaks.

| Cycle number | Area of the stripping peak -cathodic (mA/cm2.s) | Area of the plating peak-anodic  (mA/cm2.s) | Estimated coulombic efficiency % |
| --- | --- | --- | --- |
| 1st | 425 | 32 | 8 |
| 2nd | 398 | 61 | 15 |
| 3rd | 389 | 93 | 24 |
| 4th | 385 | 89 | 23 |
| 5th | 380 | 102 | 27 |
| 6th | 378 | 106 | 28 |
| 7th | 377 | 112 | 30 |
| 8th | 378 | 115 | 30 |
| 9th | 377 | 120 | 32 |
| 10th | 375 | 127 | 34 |

**Supplementary Table 7.** Estimated coulombic efficiencies of [C2moxa][BF4]/20 mol% LiBF4 system (at RT), derived from the area of the respective cathodic and anodic peaks.

| Cycle number | Area of the stripping peak -cathodic (mA/cm2.s) | Area of the plating peak-anodic  (mA/cm2.s) | Estimated coulombic efficiency % |
| --- | --- | --- | --- |
| 1st | 80 | 21 | 26 |
| 2nd | 65 | 26 | 40 |
| 3rd | 60 | 23 | 38 |
| 4th | 56 | 19 | 34 |
| 5th | 55 | 19 | 35 |
| 6th | 54 | 14 | 26 |
| 7th | 51 | 9 | 18 |
| 8th | 47 | 10 | 21 |
| 9th | 45 | 10 | 22 |
| 10th | 47 | 9 | 19 |

**Supplementary Table 8.** Estimated coulombic efficiencies of [C2moxa][BF4]/50 mol% LiBF4 system (at 50 °C) derived from the area of the respective cathodic and anodic peaks.

| Cycle number | Area of the stripping peak -cathodic (mA/cm2.s) | Area of the plating peak-anodic  (mA/cm2.s) | Estimated coulombic efficiency % |
| --- | --- | --- | --- |
| 1st | 72 | 21 | 29 |
| 2nd | 65 | 17 | 26 |
| 3rd | 60 | 13 | 22 |
| 4th | 60 | 13 | 22 |
| 5th | 57 | 10 | 18 |
| 6th | 54 | 10 | 19 |
| 7th | 51 | 10 | 20 |
| 8th | 50 | 8 | 16 |
| 9th | 48 | 9 | 19 |
| 10th | 46 | 10 | 22 |





**Supplementary Figure 3.** Cyclic voltammogram of the 50 mol% LiBF4 in [C2moxa][BF4] electrolyte at room temperature

**Supplementary Table 9.** Estimated coulombic efficiencies of [C2moxa][BF4]/50 mol% LiBF4 system (at RT) derived from the area of the respective cathodic and anodic peaks.

| Cycle number | Area of the stripping peak -cathodic (mA/cm2.s) | Area of the plating peak-anodic  (mA/cm2.s) | Estimated coulombic efficiency % |
| --- | --- | --- | --- |
| 1st | 2 | 0.4 | 20 |
| 2nd | 2 | 0.3 | 15 |
| 3rd | 2 | 0.3 | 15 |
| 4th | 2 | 0.2 | 10 |
| 5th | 2 | 0.1 | 5 |
| 6th | 2 | 0.1 | 5 |
| 7th | 2 | 0.1 | 5 |
| 8th | 2 | 0.1 | 5 |
| 9th | 2 | 0.1 | 5 |
| 10th | 2 | 0.1 | 5 |

**Supplementary Table 10.** The calculated activation energies of the neat OIPCs and IL

| OIPC/IL | Activation energy (*Ea,σ*) kJ mol-1 |
| --- | --- |
| [C2moxa][BF4] | 45 |
| [C2moxa][FSI] | 40 |
| [C2moxa][PF6] | 22 |
| [C2moxa][FTFSI] | 21 |

The Arrhenius plot was generated for the conductivity data of the three neat OIPCs, [C2moxa][BF4], [C2moxa][FSI], and [C2moxa][PF6], and the ionic liquid [C2moxa][FTFSI]. The activation energy (*Ea*) was determined using the equation below,

is the activation energy for ion transport by migration, of the transport property σ ,and is calculated from the slope of the Arrhenius plot.

The highest *Ea,σ* is reported with the [BF4]- anion whereas the lowest is reported with [FTFSI]- anion. [C2moxa][BF4] requires the most energy for ionic motion and [C2moxa][FTFSI] with the lowest activation energy implies enhanced ionic mobility, consistent with this being an ionic liquid.
